# Supplementary material for: Ratiometric sensing of β-galactosidase based on excited-state intramolecular proton transfer (ESIPT) and solid-state luminescence enhancement
Source: Royal Society of Chemistry journal article supplement (doi:10.1039/d3qo00605k), 2023-01-01
Supplement: d3qo00605k1.pdf [file d3qo00605k1.pdf]

## Supporting Information

### **Ratiometric sensing of $\beta$ -galactosidase based on excited-state intramolecular proton transfer (ESIPT) and solid-state luminescence enhancement**

He Tian, Jr.,<sup>a</sup> Wei Lin,<sup>a</sup> Xi-Le Hu,<sup>a</sup> Jing-Bo Wang,<sup>a</sup> Min-Yu Zhang,<sup>a</sup> Yi Zang,<sup>b,f,g</sup> Xin-Yan Wu,<sup>a</sup> Jia Li,<sup>b,f\*</sup> Tony D. James<sup>d,e\*</sup> and Xiao-Peng He<sup>a,c\*</sup>

<sup>a</sup>Key Laboratory for Advanced Materials and Joint International Research Laboratory of Precision Chemistry and Molecular Engineering, Feringa Nobel Prize Scientist Joint Research Center, School of Chemistry and Molecular Engineering, East China University of Science and Technology, 130 Meilong Rd., Shanghai 200237, China

<sup>b</sup>National Center for Drug Screening, State Key Laboratory of Drug Research, Shanghai Institute of Materia Medica, Chinese Academy of Sciences, Shanghai 201203, China.

<sup>c</sup>National Center for Liver Cancer, the International Cooperation Laboratory on Signal Transduction, Eastern Hepatobiliary Surgery Hospital, Shanghai 200438, China

<sup>d</sup>Department of Chemistry, University of Bath, Bath, BA2 7AY, UK

<sup>e</sup>School of Chemistry and Chemical Engineering, Henan Normal University, Xinxiang 453007, China

<sup>f</sup>School of Pharmaceutical Science and Technology, Hangzhou Institute for Advanced Study, University of Chinese Academy of Sciences, Hangzhou 310024, China.

<sup>g</sup>Lingang laboratory, Shanghai 201203, China

Corresponding authors. [jli@simm.ac.cn](mailto:jli@simm.ac.cn) (J. Li), [t.d.james@bath.ac.uk](mailto:t.d.james@bath.ac.uk) (T. D. James) and [xphe@ecust.edu.cn](mailto:xphe@ecust.edu.cn) (X.-P. He)

## **Contents list**

1. Experimental section
2. Additional Figures
3. Original spectra of new compounds
4. Additional references

## 1 Experimental Section

**General remarks.** All purchased chemicals and reagents were of analytical grade. The  $\beta$ -galactosidase ( $\beta$ -Gal) used in this study was purchased from Sigma-Aldrich (origin: *Escherichia coli*). Absorption spectra were measured on a Varian Cary 500 UV-vis spectrophotometer. Fluorescence spectra were obtained on a Varian Cary Eclipse fluorescence spectrophotometer with a function of automatic wavelength correction. High-resolution transmission electron microscopy (HRTEM) was performed on JEOL 2100 equipped with a Gatan Orius charged-coupled device camera (Tridiem energy filter operating at 200 kV) and Talos F200X TEM. Dynamic light scattering was measured by a Malvern Zetasizer Nano ZS instrument.

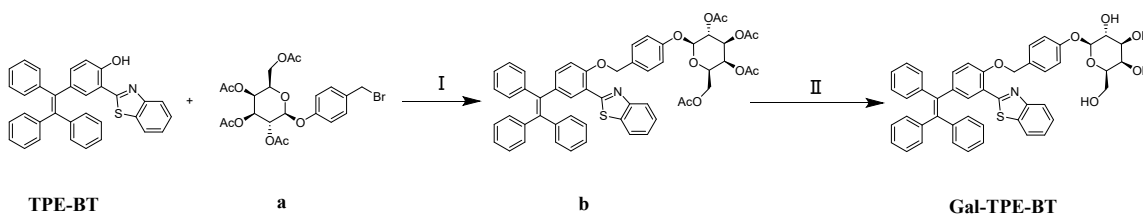

**Scheme S1.** Synthesis of **Gal-TPE-BT**. Reagents and conditions: (I)  $K_2CO_3$ /DMF; (II)  $CH_3ONa/CH_3OH$ .

**Synthesis of b.** To a solution of **TPE-BT**<sup>1</sup> (192 mg, 0.4 mmol) and  $K_2CO_3$  (110 mg, 0.8 mmol) in  $CH_3CN$  (10 mL), **a**<sup>2</sup> (248 mg, 0.48 mmol) was added, and the resulting mixture was stirred at 40 °C temperature for 5 h under an argon atmosphere. Then, the mixture was diluted by  $CH_2Cl_2$  and washed by brine. The combined organic layer was dried over  $MgSO_4$ , filtered, and concentrated in vacuum to give a crude product, which was then purified by column chromatography (Petroleum ether (PE)/ $CH_2Cl_2$  = 1:1, v/v) to obtain the acetyl intermediate **b** as a white solid (250 mg, 68% yield). TLC:  $R_f$  0.3 (PE/ $CH_2Cl_2$  = 1:2, v/v). <sup>1</sup>H NMR (400 MHz,  $CDCl_3$ ):  $\delta$  8.23 (d,  $J$  = 2.1 Hz, 1H), 8.01 (d,  $J$  = 8.2 Hz, 1H), 7.85 (d,  $J$  = 7.9 Hz, 1H), 7.46 (t,  $J$  = 9.0 Hz, 3H), 7.34 (t,  $J$  = 7.5 Hz, 1H), 7.15-7.10 (m, 13H), 7.06 (dd,  $J$  = 7.9, 3.1 Hz, 5H), 6.86 (d,  $J$  = 8.6 Hz, 1H), 5.55 (dd,  $J$  = 10.4, 8.0 Hz, 1H), 5.50 (d,  $J$  = 3.3 Hz, 1H), 5.21 (s, 2H), 5.16 (dd,  $J$  = 10.0, 2.9 Hz, 1H), 5.12 (d,  $J$  = 8.0 Hz, 1H), 4.24 (dd,  $J$  = 11.3, 6.7 Hz, 2H), 4.11 (t,  $J$  = 6.7 Hz, 1H), 2.22 (s, 3H), 2.11 (s, 3H), 2.05 (s, 6H); <sup>13</sup>C NMR (151 MHz,  $CDCl_3$ )  $\delta$  170.3, 170.2, 170.1, 169.4, 162.9, 156.8, 154.8, 151.9, 143.7, 143.6, 143.2, 141.2, 139.7, 137.1, 136.0, 134.8, 132.4, 131.4, 131.3, 131.2, 130.9, 129.6, 127.8, 127.7, 127.7, 126.6, 126.4, 125.8, 124.5, 122.8, 122.1, 121.2, 117.0, 116.9, 112.2, 99.5, 71.1, 70.8, 70.5, 68.6, 66.8, 61.3, 20.8, 20.7, 20.7, 20.6. HR-ESI-MS ( $m/z$ )  $[M+H]^+$ : calcd for  $C_{54}H_{48}NO_{11}S^+$  918.2943, found 918.2939.

**Synthesis of Gal-TPE-BT.** To a CH<sub>3</sub>OH (20 mL) solution of **b** (200 mg, 0.22 mmol) was added CH<sub>3</sub>ONa (1.4 mL, 5.9 mmol). The mixture was stirred over night at room temperature, and then concentrated in vacuum to give a crude product. This product was then purified by column chromatography (CH<sub>2</sub>Cl<sub>2</sub>/MeOH = 20:1, v/v) to obtain **Gal-TPE-BT** as a white solid (120 mg, 72.7% yield). TLC: *R<sub>f</sub>* 0.4 (CH<sub>2</sub>Cl<sub>2</sub>/MeOH = 10:1, v/v). <sup>1</sup>H NMR (400 MHz, DMSO-*d*<sub>6</sub>): δ 8.11 (d, *J* = 2.0 Hz, 1H), 8.04 (d, *J* = 8.0 Hz, 1H), 7.95 (d, *J* = 8.1 Hz, 1H), 7.48 (dd, *J* = 14.3, 8.0 Hz, 3H), 7.37 (t, *J* = 7.6 Hz, 1H), 7.19-7.07 (m, 12H), 7.07-7.02 (m, 5H), 7.02-6.97 (m, 2H), 5.28 (s, 2H), 5.22 (d, *J* = 5.0 Hz, 1H), 4.91 (d, *J* = 5.3 Hz, 1H), 4.88 (d, *J* = 7.7 Hz, 1H), 4.69 (t, *J* = 5.1 Hz, 1H), 4.55 (d, *J* = 4.0 Hz, 1H), 3.72 (s, 1H), 3.63-3.49 (m, 4H), 3.46-3.41 (m, 1H); <sup>13</sup>C NMR (151 MHz, DMSO-*d*<sub>6</sub>) δ 162.3, 157.9, 155.0, 151.7, 143.7, 143.6, 143.4, 141.3, 139.9, 136.6, 135.8, 135.2, 131.2, 131.2, 131.1, 131.1, 130.4, 129.4, 128.4, 128.3, 127.2, 127.1, 127.0, 126.7, 125.4, 122.8, 122.2, 121.4, 116.5, 113.6, 101.3, 76.0, 73.8, 70.7, 68.6, 60.9. HR-ESI-MS(*m/z*) [M+Na]<sup>+</sup>: calcd for C<sub>46</sub>H<sub>39</sub>NNaO<sub>7</sub>S<sup>+</sup> 772.2339, found 772.2338.

## 2 Additional Figures

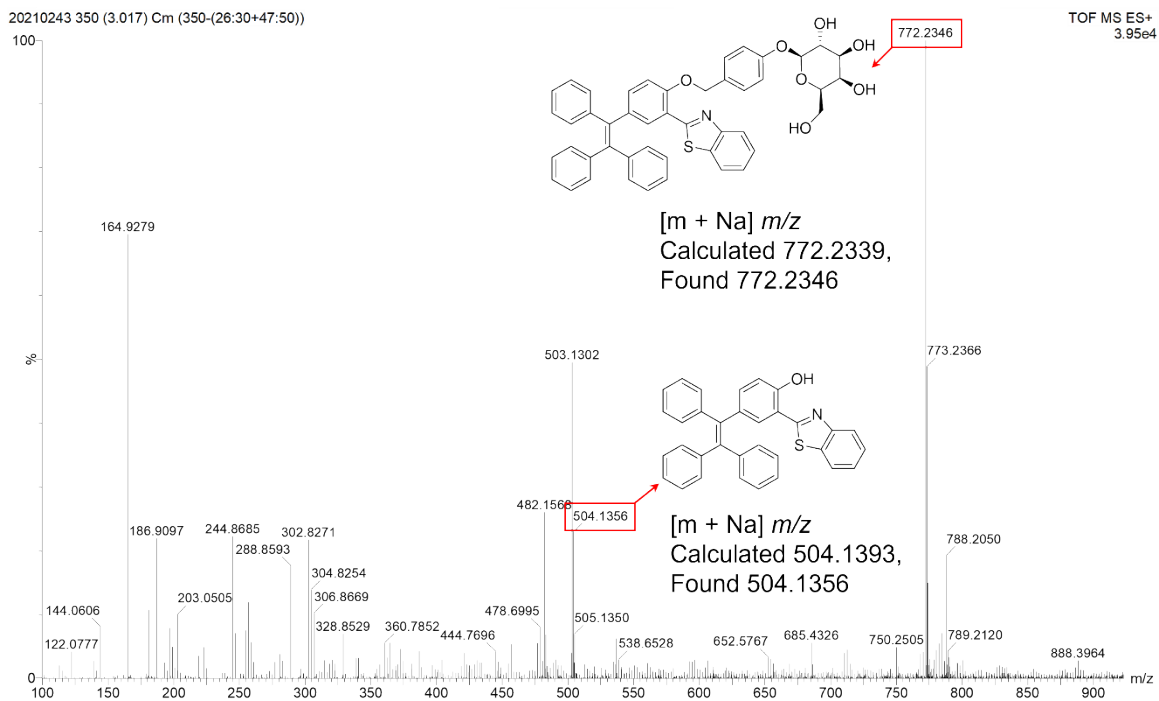

**Figure S1.** High-resolution mass spectrum of **Gal-TPE-BT** after treatment with  $\beta$ -Gal. The deglycosylation product **TPE-BT** is detected in the spectrum.

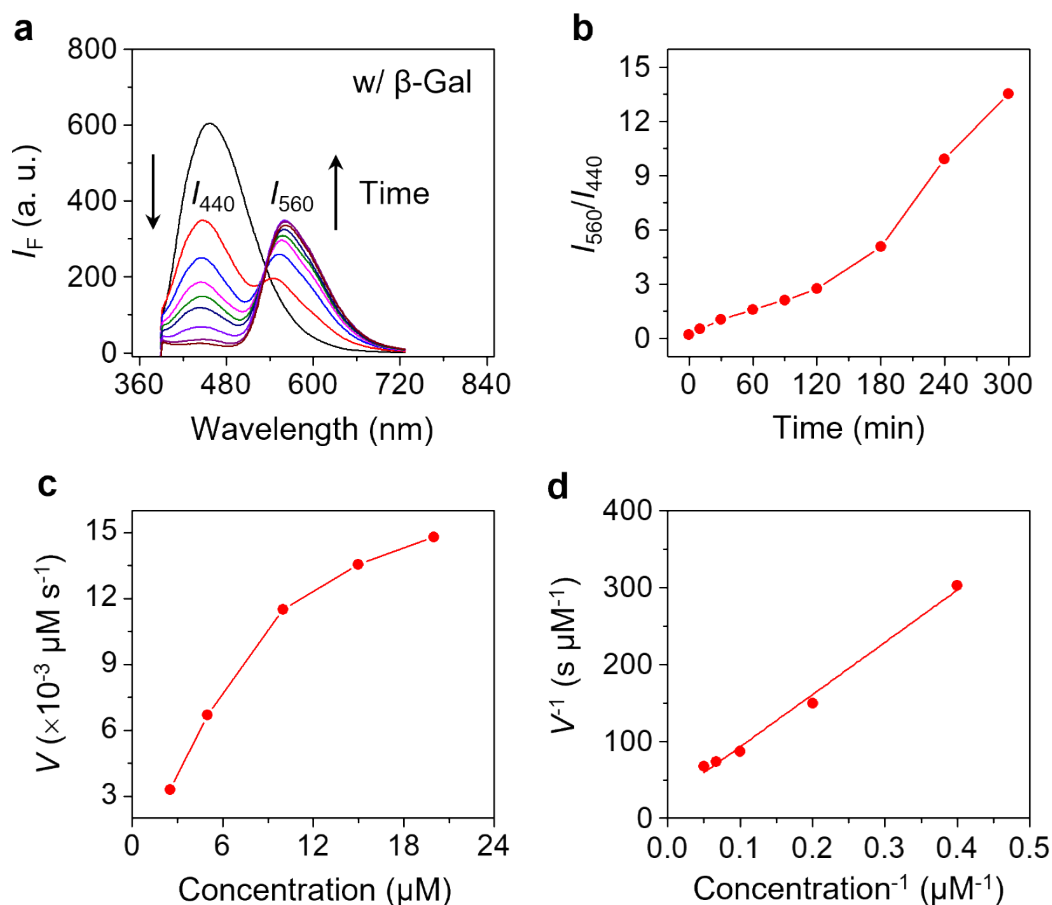

**Figure S2.** (a) Fluorescence emission spectra of **Gal-TPE-BT** (10  $\mu\text{M}$ ) in the presence of  $\beta\text{-Gal}$  (8  $\text{U mL}^{-1}$ ) with time (0-300 min). (b) Time-dependent changes in the fluorescence emission intensity ratio ( $I_{560}/I_{440}$ ) of **Gal-TPE-BT** (10  $\mu\text{M}$ ) in the presence of  $\beta\text{-Gal}$  (8  $\text{U mL}^{-1}$ ). (c) Michaelis-Menten kinetics of increasing concentrations of **Gal-TPE-BT** (2.5, 5, 10, 15 and 20  $\mu\text{M}$ ) in the presence of  $\beta\text{-Gal}$  (8  $\text{U mL}^{-1}$ ) in a solvent mixture of phosphate buffered saline (PBS) (0.01 M, pH 7.4)/DMSO (7:3, v/v). (d) Double reciprocal plots of  $1/V$  vs  $1/[\text{Gal-TPE-BT}]$ , where the Y-intercept of the equation is  $1/V_{\text{max}}$ , and the absolute value of the X-intercept is  $1/K_m$ .<sup>3</sup>

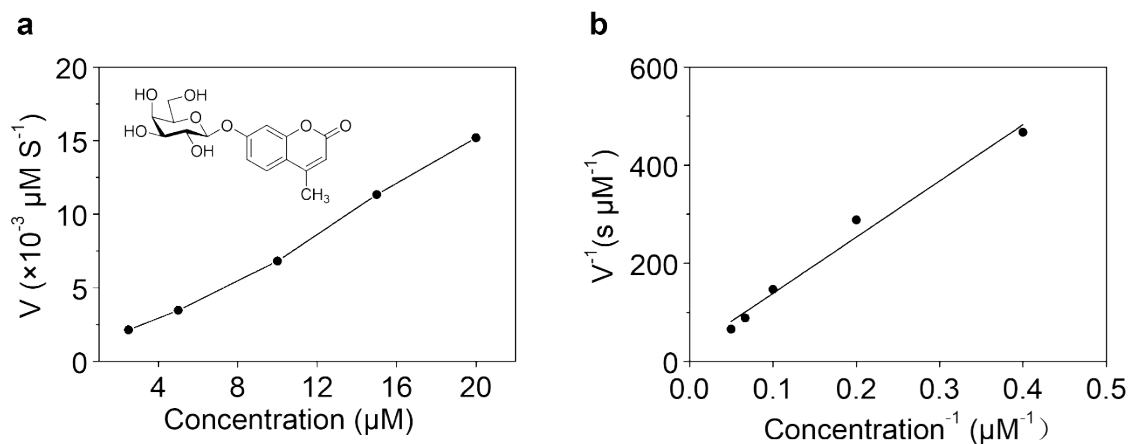

**Fig. S3.** (a) Michaelis-Menten kinetics of increasing concentrations of **4-MU-β-Gal** (2.5, 5, 10, 15 and 20 μM) in the presence of β-Gal (8 U mL<sup>-1</sup>) in phosphate buffered saline (0.01 M, pH 7.4) (Inset: Chemical structure of **4-MU-β-Gal**). (b) Double reciprocal plots of  $1/V$  vs  $1/[\text{4-MU-}\beta\text{-Gal}]$ , where the Y-intercept of the equation is  $1/V_{\text{max}}$ , and the absolute value of the X-intercept is  $1/K_m$ .

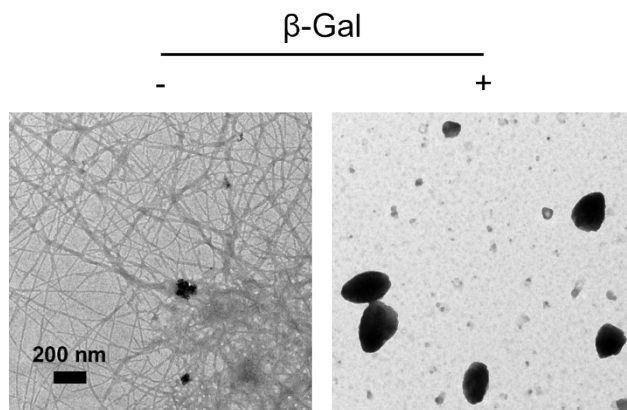

**Fig. S4.** Transmission-electronic microscopic images of **Gal-TPE-BT** (10 μM) without and with treatment of β-Gal (8 U mL<sup>-1</sup>) in a solvent mixture of phosphate buffered saline (PBS) (0.01 M, pH 7.4)/DMSO (7:3, v/v).

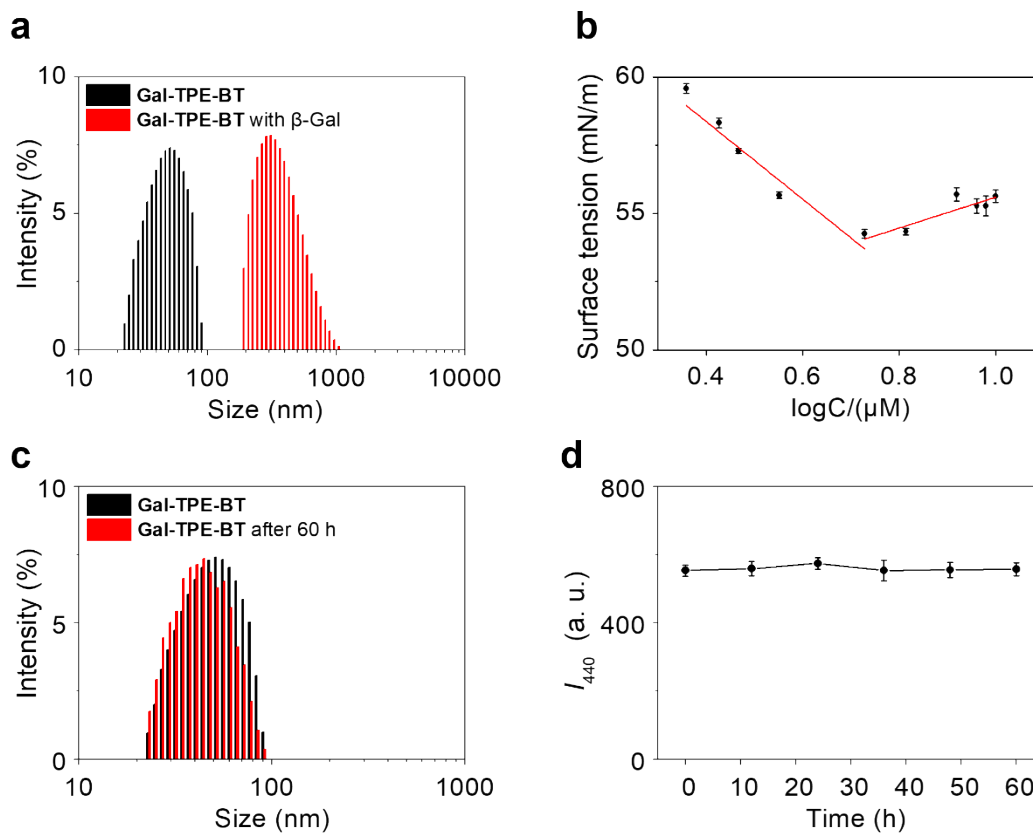

**Fig. S5.** (a) Dynamic light scattering (DLS) of **Gal-TPE-BT** ( $10 \mu\text{M}$ ) without and with treatment of  $\beta$ -Gal ( $8 \text{ U mL}^{-1}$ ). (b) Surface tension- $\log C$  plot of **Gal-TPE-BT**. (c) DLS of **Gal-TPE-BT** ( $10 \mu\text{M}$ ) before and after incubation for 60 h in PBS. (d) Time-dependent fluorescence emission intensity changes of **Gal-TPE-BT** ( $10 \mu\text{M}$ ) at 440 nm in PBS. All measurements were performed in a solvent mixture of phosphate buffered saline (PBS) ( $0.01 \text{ M}$ , pH 7.4)/DMSO (7:3, v/v).



### 3 Original spectra of new compounds

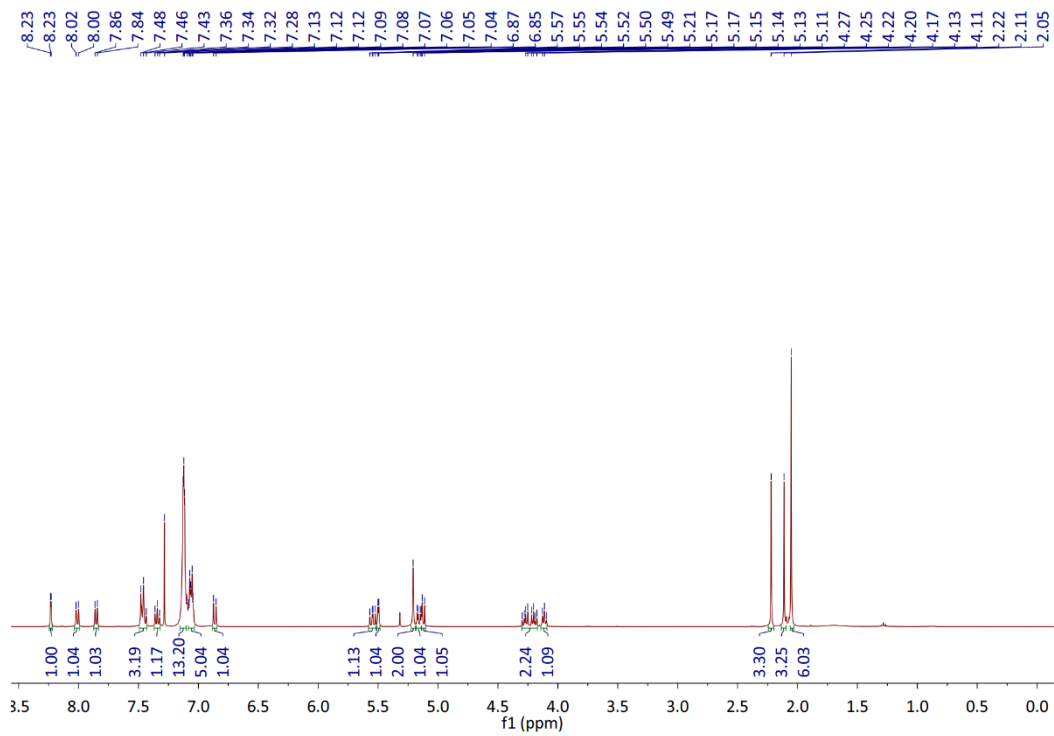

<sup>1</sup>H NMR of **b**.

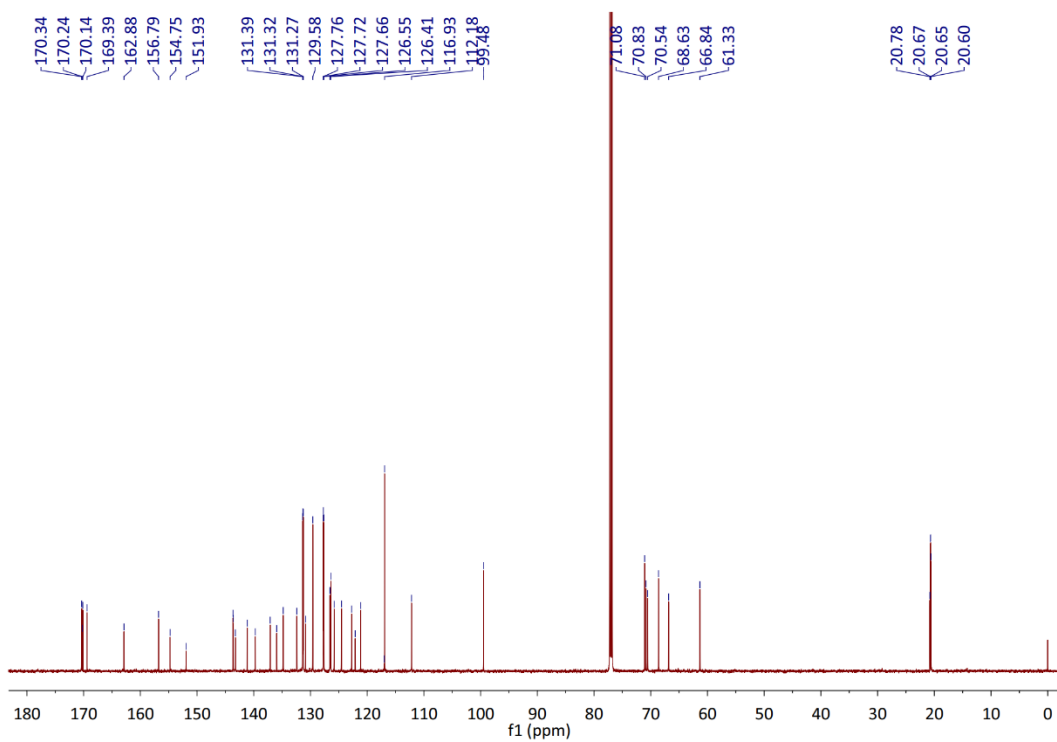

<sup>13</sup>C NMR of **b**.

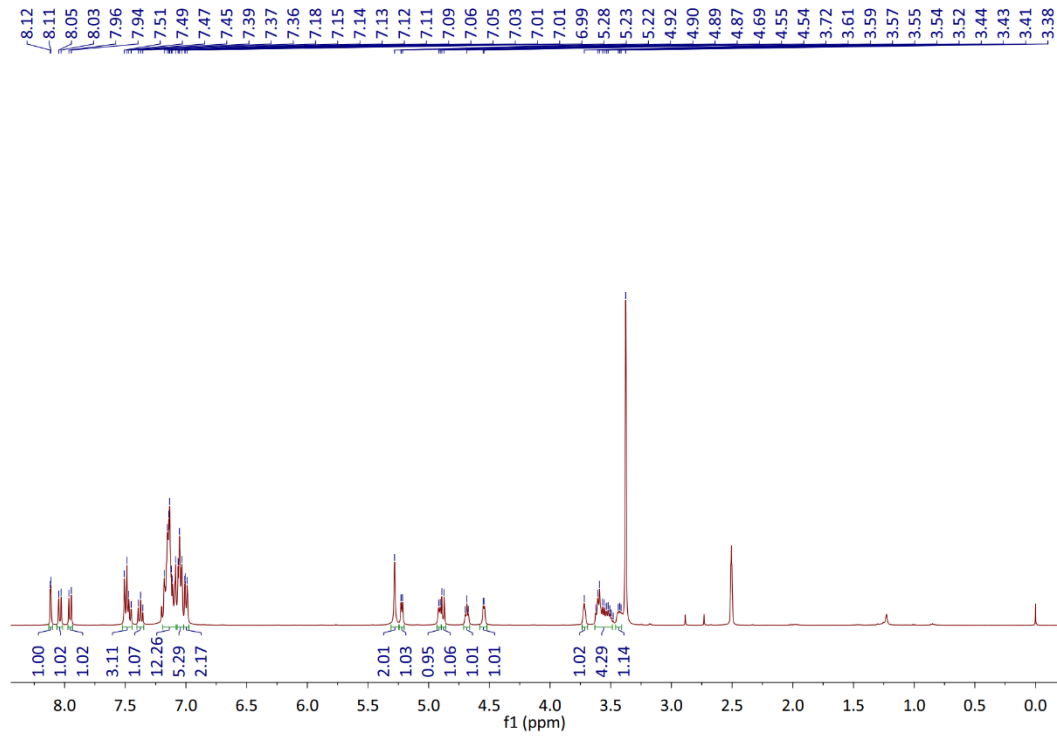

<sup>1</sup>H NMR of Gal-TPE-BT.

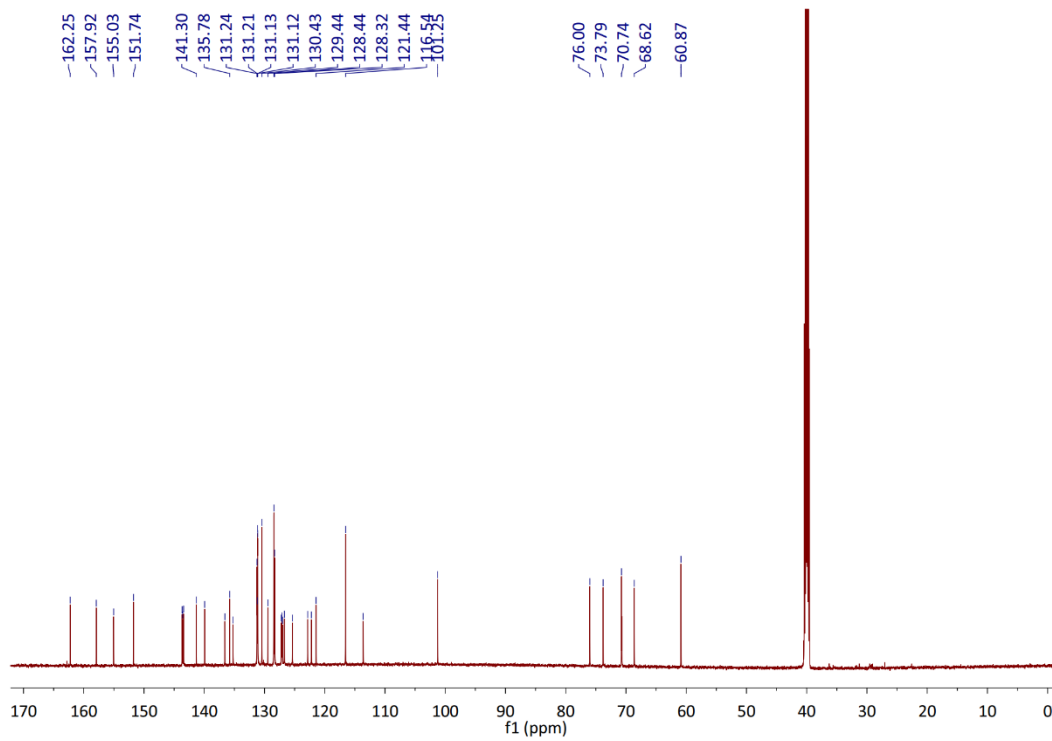

<sup>13</sup>C NMR of Gal-TPE-BT.

#### 4 Additional References

1. Y. Liu, J. Nie, J. Niu, W. S. Wang and W. Y. Lin, An AIE+ESIPT ratiometric fluorescent probe for monitoring sulfur dioxide with distinct ratiometric fluorescence signals in mammalian cells, mouse embryonic fibroblast and zebrafish. *J. Mater. Chem. B.*, 2018, **6**, 1973.
2. J. N. Chen, H. M. Pan, Z. J. Wang, J. Gao, J. H. Tan, Z. R. Ouyang, W. Guo, X. F. Gu, Imaging of ovarian cancers using enzyme activatable probes with second near-infrared window emission, *Chem. Commun.*, 2020, **56**, 2731.
3. R. C. Yandamuri, R. Gautam, C. Darkoh, V. Dareddy, M. El-Bouhssini and B. A. Clack, Cloning, expression, sequence analysis and homology modeling of the prolyl endoprotease from *Eurygaster integriceps puton*, *Insects*, 2014, **5**, 762.
